# Supplementary material
Source: publisher site journal article supplement (https://www.spandidos-publications.com/2214/downloadSupplementary)

Figure S1. The survival curves of the two capsular invasion groups were statistically significantly different.

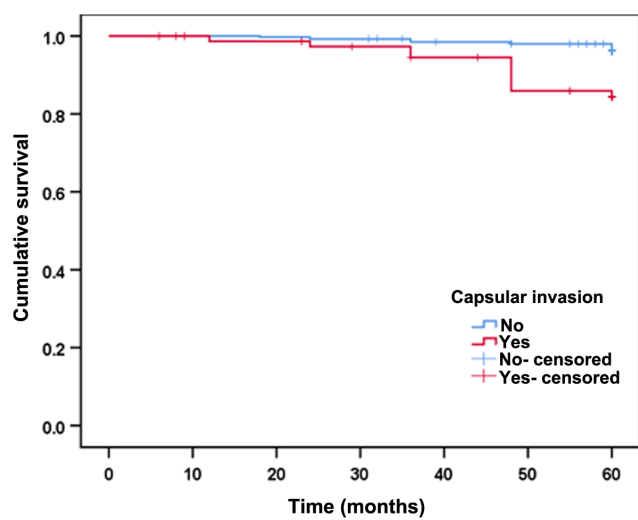

Figure S2. The survival curves of the two single central lymph node metastasis groups were no statistically significantly different.

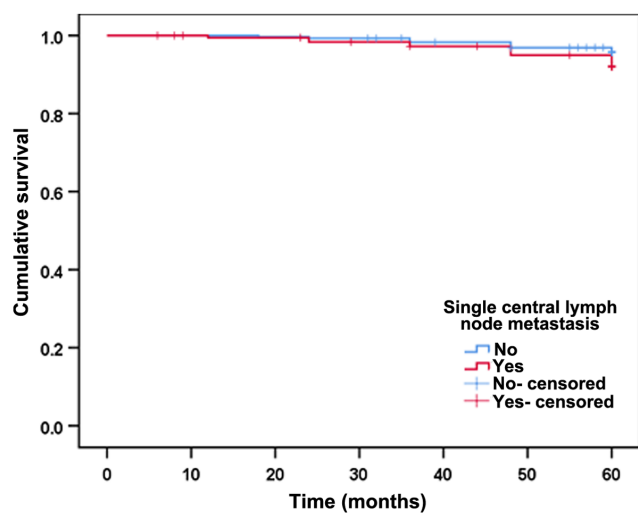

Supplement: Supplementary file 1 [file downloadSupplementary]
